# Supplementary material for: Phylogenetics and environmental distribution of nitric oxide-forming nitrite reductases reveal their distinct functional and ecological roles
Source: ISME Commun. 2024 Feb 2;4(1):ycae020. doi: 10.1093/ismeco/ycae020 (PMC10999283; doi:10.1093/ismeco/ycae020)
Supplement: Supplementary_Figure_2_ycae020 [file supplementary_figure_2_ycae020.pdf]

**Fig. S2 Representative NirK alignment.** Yellow boxes represent >70% conserved residues and red boxes represent identical residues. Green boxes mark characteristic conserved motifs differentiating NirK from other MCOs (**H**niD**fH**- (or -**H**ni**SfH**- in clade 5; [91]) rather than **H**ti**HFH**- in motif I; **YHC**ap- instead of -**YHCH**vm- in motif II; -trp**H**vIG- instead of -ins**fH**IG- in motif IV; and -GiYAyd**H**- instead of GkYm**FH**A**H**- in motif V), and blue boxes mark functionally important residues. From top to bottom, the sequences represent: clade 1c: *Haloferax denitrificans*; clade 4: *Nitrosoarchaeum sp.*; clade 5: *Thioalkalivibrio thiocyanoxidans*; clade 4: *Nitrososphaera viennensis*; Clade 7: *Nitrospira nitrificans*; clade 1g: *Fusarium oxysporum*; cladeless anammox: *Scalindua rubra*; clade 8: *Paenibacillus amylolyticus*; clade 3: *Propionibacterium australiense*; clade 11: *Burkholderia mallei*; clade 1a: *Nitrosomonas oligotropha*; clade 9: *Rhodanobacter glycinis*. The Fig. was prepared in ESPscript/ENDscript.
